# Supplementary material for: Graphene Quantum-Dot-Based Nanophotonic Approach for Targeted Detection of Long Noncoding RNAs in Circulation
Source: PubMed Central journal article supplement — ACS Omega. 2022 Jul 22;7(30):26601–9. doi: 10.1021/acsomega.2c02802 (PMC9352251; doi:10.1021/acsomega.2c02802), 2022-07-22
Supplement: ao2c02802_si_001.pdf [file ao2c02802_si_001.pdf]

**Title:** Graphene quantum dot-based nano-photonic approach for targeted detection of long non-coding RNAs in circulation

**Authors:** Ruchita Shandilya<sup>1#</sup>, Arpit Bhargava<sup>1#</sup>, Pooja Ratre<sup>1</sup>, Roshani Kumari<sup>1</sup>, Rajnarayan Tiwari<sup>1</sup>, Prachi Chauhan<sup>1</sup>, Pradyumna Kumar Mishra<sup>1\*</sup>

<sup>1</sup>Department of Molecular Biology, ICMR-National Institute for Research in Environmental Health, Bhopal, India

<sup>#</sup>Authors contributed equally

**\*Author for correspondence:**

Prof. (Dr.) Pradyumna Kumar Mishra, MS, PhD, Fulbright-Nehru Fellow (USA), AIMF, FAMS, Scientist - F & Head, Department of Molecular Biology, ICMR-National Institute for Research in Environmental Health, Bypass Road, Bhauri, Bhopal (MP) - 462001, India, Mobile: +91 94799 83943; e-mail: pkm\_8bh@yahoo.co.uk, <https://orcid.org/0000-0002-0795-2819>

Figure S1

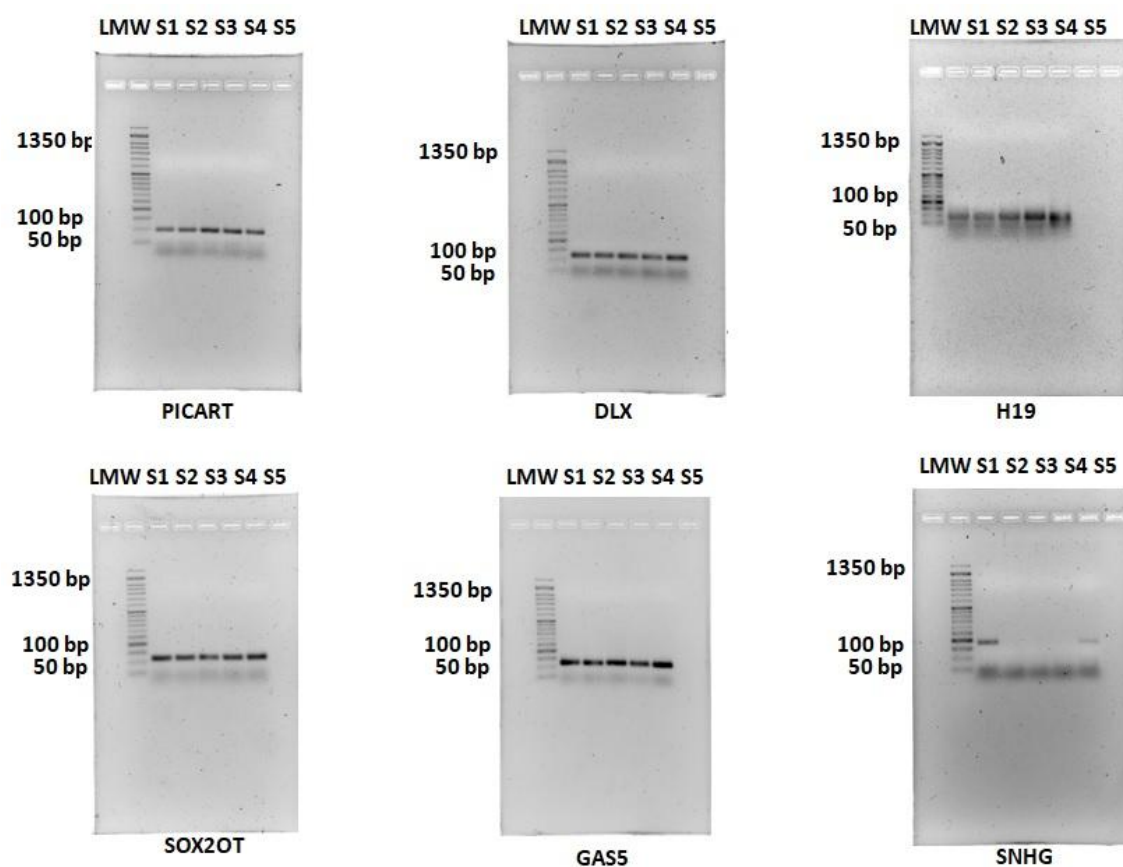

Figure S1: Representative gel images showing the expression profiling of circulating lncRNAs (PICART, DLX, H19, SOX2OT, GAS-5 and SNHG) in five samples (S1-S5).
